# Supplementary material for: Isolation, diversity, and antimicrobial activity of fungal endophytes from Rohdea chinensis (Baker) N.Tanaka (synonym Tupistra chinensis Baker) of Qinling Mountains, China
Source: PeerJ. 2020 Jun 17;8:e9342. doi: 10.7717/peerj.9342 (PMC7305772; doi:10.7717/peerj.9342)
Supplement: File S1 [file peerj-08-9342-s001.xlsx]

## Sheet: Sheet1
Fungal isolate	Accession number	Closest relatives in NCBI	ITS identity (%)	Sequence length（bp）	Sequence
F8001	MK367469	Leptospora rubella ZLVG 319 (HE774478)	96.61	576bp	GGGGAATTTGATAGTAGCTTGCTACTGCGCTGGGGGAGATGGGAAAGTCCTGGCTGAAAAGCTGGTGTACCGGTACCTGCACCCCTATCATACCCTTGTCTTTTGAGTACTTATGTTTCCTTGGTGGGCTTGCCTGCCGACAGGACAAACTTTAAACCTTTTTAAATATCAATCAGCGTCTGAAAAATAATTAATAATTACAACTTTCAACAACGGATCTCTTGGTTCTGGCATCGATGAAGAACGCAGCGAAATGCGATAAGTAGTGTGAATTGCAGAATTCAGTGAATCATCGAATCTTTGAACGCACATTGCGCCCCTTGGTATTCCATGGGGCATGCCTGTTCGAGCGTCATTTGTACCCTCAAGCTATGCTTGGTGTTGGGTGATTGTCCAGCC…
F8002	MK367470	Chaetomium murorum GYJ2 (KM268657)	99.44	541bp	GGGGATACGAGTTGCAACTCCCTAAACCATTGTGAACGTTACCTATACCGTTGCTTCGGCGGGCGGCCCCGGGGTTTACCCCCCGGGCGCCCCTGGGCCCCACCGCGGGCGCCCGCCGGAGGTCACCAAACTCTTGATAATTTATGGCCTCTCTGAGTCTTCTGTACTGAATAAGTCAAAACTTTCAACAACGGATCTCTTGGTTCTGGCATCGATGAAGAACGCAGCGAAATGCGATAAGTAATGTGAATTGCAGAATTCAGTGAATCATCGAATCTTTGAACGCACATTGCGCCCGCCAGCATTCTGGCGGGCATGCCTGTTCGAGCGTCATTTCAACCATCAAGCCCCCGGGCTTGTGTTGGGGACCTGCGGCTGCCGCAGGCCCTGAAAAGCAGT…
F8003	MK367471	Leptostroma sp. Ecf-5 (MK211262)	99.65	578bp	GGATTTCCCGTACGGCGCTCACCGGCGCCGGTTCTCAAACCACTGCGTATGAAGCTCTCGAGGTTGCCTCCCGGCTGGCGTGCGGCTCCCGCGCGCCCGCCGGGGGGGTCAACAGCCCGAGACTCGTTTCCTTCGCGGGGTACCCCCCCGCGGCAGGACGCTACCAAACATTTTGTCAAGATGTCATCGTCTGAACCTATTGAAAAAATAGAAAATACAACTTTTAACAATGGATCTCTTGGCTCCGGCATCGATGAAGAACGCAGCGAAATGCGATAACTAGTGTGAATTGCAGATTTCAGTGAATCATCGAGTCTTTGAACGCACATTGCGCCTCTTGGTATTCCTCGAGGCATGCCTGTTCGAGCGTCGTTTCACCCCTCAAGCGCAAGCTTGGTG…
F8004	MK367472	Dactylonectria macrodidyma (MF567498)	99.61	519bp	GAAATTTCCGAGTTTCACTCCCAACCCCTGTGACATACCTATTTGTTGCCTCGGCGGTGCCTGTTCCGACAGCCCGCCAGAGGACCCCAAACCCTGATTACATTTAAGAAGTCTTCTGAGTAAACCGATTAAATAAATCAAAACTTTCAACAACGGATCTCTTGGTTCTGGCATCGATGAAGAACGCAGCGAAATGCGATAAGTAATGTGAATTGCAGAATTCAGTGAATCATCGAATCTTTGAACGCACATTGCGCCCGCTAGTATTCTGGCGGGCATGCCTGTCCGAGCGTCATTTCAACCCTCAAGCCCCCGGGCTTGGTGTTGGGGATCGGCGAGCCTCCGCGCCCGCCGTCCCCTAAATCTAGTGGCGGTCTCGCTGTAGCTTCCTCTGCGTAG…
F8005	MK367473	Merimbla ingelheimensis NRRL 6221 (GU092956)	99.09	557bp	GGGCTTCGAGTGCGGGCTCTGGGTCACCTCCCACCCGTGTTTATCGTACCTTGTTGCTTCGGCGGGCCCGCCGTCAGGCCGCCGGGGGGCGTCTGCCCCCGGGCCCGCGCCCGCCGAAGACACCATCGAACGCTGTCTGAAGGTTGCCGTCTGAGTCGATTATCAAATCGTTAAAACTTTCAACAACGGATCTCTTGGTTCCGGCATCGATGAAGAACGCAGCGAAATGCGATAAGTAATGTGAATTGCAGAATTCAGTGAATCATCGAGTCTTTGAACGCACATTGCGCCCCCTGGTATTCCGGGGGGCATGCCTGTCCGAGCGTCATTGCTGCCCTCAAGCCCGGCTTGTGTGTTGGGTCGCCGTCCCCCCCGGGGACGGGCCCGAAAGGCAGCGGC…
F8006	MK367474	Cladosporium cucumerinum SCAU175 (MH464423)	100	510bp	AATAAGGTGACCGGCTACGGCCGGGATGTTCATAACCCTTTGTTGTCCGACTCTGTTGCCTCCGGGGCGACCCTGCCTTCGGGCGGGGGCTCCGGGTGGACACTTCAAACTCTTGCGTAACTTTGCAGTCTGAGTAAACTTAATTAATAAATTAAAACTTTTAACAACGGATCTCTTGGTTCTGGCATCGATGAAGAACGCAGCGAAATGCGATAAGTAATGTGAATTGCAGAATTCAGTGAATCATCGAATCTTTGAACGCACATTGCGCCCCCTGGTATTCCGGGGGGCATGCCTGTTCGAGCGTCATTTCACCACTCAAGCCTCGCTTGGTATTGGGCAACGCGGTCCGCCGCGTGCCTCAAATCGTCCGGCTGGGTCTTCTGTCCCCTAAGCGTT…
F8007	MK367475	Hypoxylon begae S99 (KT224877)	98.6	512bp	GCGGGACTTTTGAGTCTTACTCCACCCTATGTGAACATACTATAGTTGCCTCGGCGCGGCTTCAGGGCCTCGCCGGTGGACCACTAAACTCTGATTTATCCACTGTATCTCTGAATTTAATAACGAAATACGTTAAAACTTTCAACAACGGATCTCTTGGTTCTGGCATCGATGAAGAACGCAGCGAAATGCGATAAGTAATGTGAATTGCAGAATTCAGTGAATCATCGAATCTTTGAACGCACATTGCGCCCATTAGTATTCTAGTGGGCATGCCTATTCGAGCGTCATTTCAACCCTTACGCCTTGTAGCGTAGTGTTGGGAATCTACCGAAAGGTAGTTCCTCAAATCGATTGGCGGAGTTAGTGCATACTCTAGGCGTAGTAATACCATTCTCG…
F8008	MK367476	Pleosporales sp. JP151(AB255289)	95.99	522bp	AATAATGCAAATCGGGGTACATTGCAGCTTGCTGCTCTAATACCTGTCTGAATCCATGTCTTTTGCGTACTTACTTGTTTCCTCGGTGGGCTTGCCCGCCGATTGGACACCATTTAAACTCTTTTGTAATTGCAATCAGCGTCTGAAAACTATAATAGTTACAACTTTCAACAACGGATCTCTTGGTTCTGGCATCGATGAAGAACGCAGCGAAATGCGATAAGTAGTGTGAATTGCAGAATTCAGTGAATCATCGAATCTTTGAACGCACATTGCGCCCCTTGGTATTCCATGGGGCATGCCTGTTCGAGCGTCATTTGTACCCTCAAGCTTTGCTTGGTGATGGGTGTTTGTCCTGTCCTTTGCGACTGGACTCGCCTTAAAGTTATTGGCAGCCGG…
F8009	MK367477	Leptosphaeria sp. ZLVG 321 (HE774480)	99.63	549bp	AAAAATTAGTAGCTTGCTACTGTTAGGGGGGTCCATTAGTCTGTATAGTATCACTACTGATGAGCAGCACGACCCTCTGTCTATACCCTTGTCTTTTGCGCACTCATGTTTCCTCGGCGGCTTAATACCCGCCGGCTGGATCAATCTATAACCTTTTTAATTTTCAATCAGCGTCTGAAAAACCTAATAATTACAACTTTCAACAACGGATCTCTTGGTTCTGGCATCGATGAAGAACGCAGCGAAATGCGATAAGTAGTGTGAATTGCAGAATTCAGTGAATCATCGAATCTTTGAACGCACATTGCGCCCCTTGGTATTCCATGGGGCATGCCTGTTCGAGCGTCATTTGTACCCTCAAGCTCTGCTTGGTGTTGGGTGTTTGTCTACTATCGTGGA…
F8011	MK367478	Setophaeosphaeria citricola CBS:143179 (MH107916)	99.8	520bp	GGGCTTCGTATAGGCGGCAGCATGCCACTATACACCCTTTGTCTTTTGCGTACTGTATGTTTCCTCGGTGGGCTCGCCCGCCGATAGGACATTTTAAAACCTTTTGTAATTGCAATCAGCGTCAGAAATAACTATAATAGTTACAACTTTCAACAACGGATCTCTTGGTTCTGGCATCGATGAAGAACGCAGCGAAATGCGAAAAGTAGTGTGAATTGCAGAATTCAGTGAATCATCGAATCTTTGAACGCACATTGCGCCCCTTGGTATTCCATGGGGCATGCCTGTTCGAGCGTCATTTGTACCCTCAAGCTCTGCTTGGTGTTGGGTGTTTGTCTCGCCATTGCGCGCAGACTCGCCTTAAAGCAATTGGCAGCCGGCAAAAGCCTGGGAGCGCAG…
F8012	MK367479	Stachybotrys echinata NRRL 1694 （AF205446）	99.82	558bp	GGAACTACGGGAGTAACTCCCAACCCTTATGTGAACCATACCTATCGTTGCTTCGGCGGGAGAGCCCCGGCCCCCTCGGGCCCGGAGTCAGGCGCCCGCCGGAGACCCCAAACTCTTTGTTTTACTTGAGTATCGTCTGAGTGGTATAAACAAATACATCAAAACTTTTAACAACGGATCTCTTGGCTCTGGCATCGATGAAGAACGCAGCGAAATGCGATAAGTAATGTGAATTGCAGAATTCAGTGAATCATCGAATCTTTGAACGCACATTGCGCCCGTCAGCATTCTGGCGGGCATGCCTGTTCGAGCGTCATTTCAACCCTCAGGACCCCCCTTTCGCGGGGAGGGACCTGGCGTTGGGGATCGGCCCGCCCCCGCGGCGGCGCCGTCCCCGAA…
F8013	MK367480	Dothideomycetes sp. AM-2020c （MN994585)	96.54	563bp	GGGACTTACTCGTAGATTTCTACTGCTCGGAGAGAGGGGAAAGTCTCCAGCCTGGCTGGCGGATGAGTACGCTCTGTCTGCACCCTTGTCTTTTTGCGTACTTCTGTTTCCTCGGCGGGCCTGCCCGCCGGTTGGACAACTTAACAACCTTTTTAATTTTCAATCAGCGTCTGAATAATTATAATAATTACAACTTTCAACAACGGATCTCTTGGTTCTGGCATCGATGAAGAACGCAGCGAAATGCGATAAGTAGTGTGAATTGCAGAATTCAGTGAATCATCGAATCTTTGAACGCACATTGCGCCCCTTGGTATTCCATGGGGCATGCTTGTTCGAGCGTCATTTGTACTCTCAAGCTTTGCTTGGTGTTGGGTGTTTGTCCTTTCCTCGCGTTTG…
F8014	MK367481	Leptosphaeria sp. ZLVG 321 (HE774480)	99.63	540bp	AATTCTTTTCTTTGGGAGCTGTTAGTCTATATCACTATAGCTGGCTCCTATTTGAAACCCTTGTCTTTTGCGTACCCATGTTTCCTCGGCGGGCTTGCCCGCCGGTTGGACAACCTTAAAACCTTTTTAATTTTCAATCAGCGTCTGAATAAACATAATAATTACAACTTTCAACAACGGATCTCTTGGTTCTGGCATCGATGAAGAACGCAGCGAAATGCGATAAGTAGTGTGAATTGCAGAATTCAGTGAATCATCGAATCTTTGAACGCACATTGCGCCCCTTGGTATTCCATGGGGCATGCCTGTTCGAGCGTCATTTGTACCCTCAAGCTATGCTTGGTGTTGGGTGTTTGTCCTCTCCTTTGCGATTGGACTCGCCTTAAAGACATTGGCAGC…
F8015	MK367482	Colletotrichum sp. Acf-5 (MK795218）	99.46	556bp	GAACTCTGGGTACGCTCTACACCCTTTGTGACATACCTAACCGTTGCTTCGGCGGGCAGGGGAAGCCTCTCGTGGGCGGACCCTCCCGGCGCCGGCCCCGTCACGGGGGCGGAGCGCCCGCCGGAGGAAACCAAACTCTATTTACACGACGTCTCTTCTGAGTGGCACAAGCAAATAATTAAAACTTTTAACAACGGATCTCTTGGTTCTGGCATCGATGAAGAACGCAGCGAAATGCGATAAGTAATGTGAATTGCAGAATTCAGTGAATCATCGAATCTTTGAACGCACATTGCGCTCGCCAGCATTCTGGCGAGCATGCCTGTTCGAGCGTCATTTCAACCCTCAAGCACCGCTTGGTTTTGGGGCCCCACGGCCGACGTGGGCCCTTAAAGGTAG…
F8016	MK367483	Penicillium sp. W24 (MG211068)	99.47	564bp	TTGATTCGAGTGAGGCTCTGGGTCCACCTCCCACCCGTGTTTATCGTACCTTGTTGCTTCGGCGGGCCCGCCTCACGGCCGCCGGGGGGCATCCGCCCCCGGGCCCGCGCCCGCCGAAGACACACAAACGAACTCTTGTCTGAAGATTGCAGTCTGAGTACTTGACTAAATCAGTTAAAACTTTCAACAACGGATCTCTTGGTTCCGGCATCGATGAAGAACGCAGCGAAATGCGATAAGTAATGTGAATTGCAGAATTCAGTGAATCATCGAGTCTTTGAACGCACATTGCGCCCCCTGGTATTCCGGGGGGCATGCCTGTCCGAGCGTCATTGCTGCCCTCAAGCACGGCTTGTGTGTTGGGCTCTCGCCCCCCGCTTCCGGGGGGCGGGCCCGAAA…
F8017	MK367484	Colletotrichum sp. Acf-5 (MK795218）	99.82	556bp	GGGACAACTGGTACGCTCTACACCCTTTGTGACATACCTAACCGTTGCTTCGGCGGGCAGGGGAAGCCTCTCGTGGGCGGACCCTCCCGGCGCCGGCCCCGTCACGGGGGCGGAGCGCCCGCCGGAGGAAACCAAACTCTATTTACACGACGTCTCTTCTGAGTGGCACAAGCAAATAATTAAAACTTTTAACAACGGATCTCTTGGTTCTGGCATCGATGAAGAACGCAGCGAAATGCGATAAGTAATGTGAATTGCAGAATTCAGTGAATCATCGAATCTTTGAACGCACATTGCGCTCGCCAGCATTCTGGCGAGCATGCCTGTTCGAGCGTCATTTCAACCCTCAAGCACCGCTTGGTTTTGGGGCCCCACGGCCGACGTGGGCCCTTAAAGGTA…
F8018	MK367485	Penicillium oxalicum QHBC11 (KC880081)	99.46	563bp	GGGATTCGAGTGAGGCTCTGGGTCACCTCCCACCCGTGTTTATCGTACCTTGTTGCTTCGGCGGGCCCGCCTCACGGCCGCCGGGGGGCATCCGCCCCCGGGCCCGCGCCCGCCGAAGACACACAAACGAACTCTTGTCTGAAGATTGCAGTCTGAGTACTTGACTAAATCAGTTAAAACTTTCAACAACGGATCTCTTGGTTCCGGCATCGATGAAGAACGCAGCGAAATGCGATAAGTAATGTGAATTGCAGAATTCAGTGAATCATCGAGTCTTTGAACGCACATTGCGCCCCCTGGTATTCCGGGGGGCATGCCTGTCCGAGCGTCATTGCTGCCCTCAAGCACGGCTTGTGTGTTGGGCTCTCGCCCCCCGCTTCCGGGGGGCGGGCCCGAAAG…
F8019	MK367486	Nemania sp. 1-00367-2 ( KT192358)	99.45	553bp	GGGAATAGGTGTATAACTCCCAACCCATGTGAACATACCTCATGTTGCCTCGGCAGGTCGTGCCTCCCTCGTAGGTCCTACCCTGTAGGCTCCTACCCGGAAGGCGCGGGTACCCCTGCCGGTGGCCCAGGAAACTCTGTCTCATCGTTGAATTCTGAACCTATAACTAAATAAGTTAAAACTTTCAACAACGGATCTCTTGGTTCTGGCATCGATGAAGAACGCAGCGAAATGCGATAAGTAATGTGAATTGCAGAATTCAGTGAATCATCGAATCTTTGAACGCACATTGCGCCCATTAGTATTCTAGTGGGCATGCCTGTTCGAGCGTCATTTCAACCCTTAAGCCCTTGTTGCTTAGCGTTGGGAGCCTACGGCACCGTAGCTCCCCAAAGTCAG…
F8020	MK367487	Rhodotorula mucilaginosa AAN6 ( LC473094)	100	581bp	GTGGCTGTGATTAGGACGTCCACTTAACTTGGAGTCCGAACTCTCACTTTCTAACCCTGTGCACTTGTTTGGGATAGTAACTCTCGCAAGAGAGCGAACTCCTATTCACTTATAAACACAAAGTCTATGAATGTATTAAATTTTATAACAAAATAAAACTTTCAACAACGGATCTCTTGGCTCTCGCATCGATGAAGAACGCAGCGAAATGCGATAAGTAATGTGAATTGCAGAATTCAGTGAATCATCGAATCTTTGAACGCACCTTGCGCTCCATGGTATTCCGTGGAGCATGCCTGTTTGAGTGTCATGAATACTTCAACCCTCCTCTTTCTTAATGATTGAAGAGGTGTTTGGTTTCTGAGCGCTGCTGGCCTTTACGGTCTAGCTCGTTCGTAA…
F8021	MK367488	Nemania sp. 1-00367-2 ( KT192358)	99.27	554bp	GGAACTAAGAGTGTATACTCCCAACCCATGTGAACATACCTCATGTTGCCTCGGCAGGTCGCGCCTCCCTCGTAGGTCCTACCCTGTAGGCTCCTACCCGGAAGGCGCGGGTACCCCTGCCGGTGGCCCAGGAAACTCTGTCTCATCGTTGAATTCTGAACCTATAACTAAATAAGTTAAAACTTTCAACAACGGATCTCTTGGTTCTGGCATCGATGAAGAACGCAGCGAAATGCGATAAGTAATGTGAATTGCAGAATTCAGTGAATCATCGAATCTTTGAACGCACATTGCGCCCATTAGTATTCTAGTGGGCATGCCTGTTCGAGCGTCATTTCAACCCTTAAGCCCTTGTTGCTTAGCGTTGGGAGCCTACGGCACCGTAGCTCCCCAAAGTCA…
F8022	MK367489	Periconia byssoides ( KP641155)	99.62	552bp	GGAATTACAGGTTCATGGCCTCGAGCTTCGGCGGAGGGGGCTACAGCCTGACTTTATACCCACCCTTTGCCTATGTGTACCCCTATTGCTTCCCTCGGCGGGTTCGCCCGCCGACAGGAACCAACTAAACCCTTTGCATTATACATTTAACACTTCCGATACAAAACTAAATTATTACAACTTTTAACAATGGATCTCTTGGTTCTGGCATCGATGAAGAACGCAGCGAAATGCGATAAGTAGTGTGAATTGCAGAATTCAGTGAATCATCGAATCTTTGAACGCACATTGCGCCCCTCGGTATTCCGTGGGGCATGCCTGTTCGAGCGTCATTTACACCCTCAAGCTATGCTTGGTGTTGGGCGTCTGTCCCGCCTTCGTGCGCGGACTCGCCTCAAA…
F8023	MK367490	Colletotrichum acutatum LL18 (KM520012)	99.82	557bp	ATTCTTGCGTACGCTCTATACCCTTTGTGACGTACCTAACCGTTGCTTCGGCGGGCAGGGGAAGCCTCTCGCGGGCCTCCCCTCCCGGCGCCGGCCCCCACCACGGGGACGGGGCGCCCGCCGGAGGAAACCAAACTCTATTTACACGACGTCTCTTCTGAGTGGCACAAGCAAATAATTAAAACTTTTAACAACGGATCTCTTGGTTCTGGCATCGATGAAGAACGCAGCGAAATGCGATAAGTAATGTGAATTGCAGAATTCAGTGAATCATCGAATCTTTGAACGCACATTGCGCTCGCCAGCATTCTGGCGAGCATGCCTGTTCGAGCGTCATTTCAACCCTCAAGCACCGCTTGGTTTTGGGGCCCCACGGCCGACGTGGGCCCTTAAAGGTAG…
F8024	MK367491	Aspergillus hiratsukae CR1 (MK734050)	99.3	577bp	TATTTCGACGCTGGGGCTCTGGGTCCACCTCCCACCCGTGTCTATTGTACCTTGTTGCTTCGGCGGGCCCGCCGTTTTCGAACGGCCGCCGGGGAGGCCTCGCGCCCCCGGGCCCGCGCCCGCCGAAGACCCCAACATGAACGCTGTTCTGAAAGTATGCAGTCTGAGTTTGATTATCATAATCAGTTAAAACTTTCAACAACGGATCTCTTGGTTCCGGCATCGATGAAGAACGCAGCGAAATGCGATAAGTAATGTGAATTGCAGAATTCAGTGAATCATCGAGTCTTTGAACGCACATTGCGCCCCCTGGTATTCCGGGGGGCATGCCTGTCCGAGCGTCATTGCTGCCCTCAAGCACGGCTTGTGTGTTGGGCCCCCGTCCCCGGTTCTCCCCGG…
F8025	MK367492	Colletotrichum sp. Acf-5 (MK795218）	99.46	556bp	GGGGACTCTGATACGCTCTACACCCTTTGTGACATACCTAACCGTTGCTTCGGCGGGCAGGGGAAGCCTCTCGTGGGCGGACCCTCCCGGCGCCGGCCCCGTCACGGGGGCGGAGCGCCCGCCGGAGGAAACCAAACTCTATTTACACGACGTCTCTTCTGAGTGGCACAAGCAAATAATTAAAACTTTTAACAACGGATCTCTTGGTTCTGGCATCGATGAAGAACGCAGCGAAATGCGATAAGTAATGTGAATTGCAGAATTCAGTGAATCATCGAATCTTTGAACGCACATTGCGCTCGCCAGCATTCTGGCGAGCATGCCTGTTCGAGCGTCATTTCAACCCTCAAGCACCGCTTGGTTTTGGGGCCCCACGGCCGACGTGGGCCCTTAAAGGTA…
F8026	MK367493	Annulohypoxylon annulatum C15 (FJ481154)	100	612bp	GAATTGCAGTACGCAACTCCATAACCCTTTGTGAACCTACCTACTGTTGCCTCGGCGTCGCGCTGCGGCTGACGCCCGCCCCTACCCGCCCTACCCGGGAGAGGAGGGGGCGGGCCTCAGCCGGCTGAACCAGCCCGCCAAAGGACCTACAAACCAAACCCTAAATCAAACGTACCTTCTGAAGAATAAAAAAAAGAATCAACTTTGAAACTTAAATAAGTCAAAACTTTCAACAACGGATCTCTTGGCTCTGGCATCGATGAAGAACGCAGCGAAATGCGATAAGTAATGTGAATTGCAGAATTCAGTGAATCATCGAATCTTTGAACGCACATTGCGCCCGCCAGCATTCTGGCGGGCATGCCTATCCGAGCGTCATTACGACCCTTAAGCCCCCCG…
F8027	MK367494	Arthrinium camelliae-sinensis LC8181 (KY494761)	99.3	584bp	CGGGAAAAGAGTAACACTCCCATACCATTTGTAAACTTTACTCAGTTATGCCTCGGCGTGAACTGCGTACGGAGTGTAGAGTGGTGTTACCCGGTAGCTTACCCTGTAGGTTACCCTGTAGCGCTACCCTGCATCGCTCCCGCGCAGCCCGCCGGTGGTACACTAAACTCTTGTTTTATTTTATATTCTGAGCGTATTATTTTAATAATTAAAACTTTCAACAACGGATCTCTTGGTTCTGGCATCGATGAAGAACGCAGCGAAATGCGATAAGTAATGTGAATTGCAGAATTCAGTGAATCATCGAATCTTTGAACGCACATTGCGCCCATCAGTATTCTGGTGGGCATGCCTGTTCGAGCGTCATTTCAACCCTTAAGCCTAGCTTAGTGTTGGGAA…
F8028	MK367495	Pestalotiopsis vismiae BH24 (MH712150)	99.31	581bp	GGGGGGTTTTGAGTATTCTACTCCCACCCATGTGAACTTACCATTGTTGCCTCGGCAGAAGCTGCTCGGTGCACCCTACCTTGGAACGGCCTACCCTGTAGCGCCTTACCCTGGAACGGCTTACCCTGTAACGGCTGTCGGTGGACTACCAAACTCTTGTTATTTTATTGTAATCTGAGCGTCTTATTTTAATAAGTCAAAACTTTCAACAACGGATCTCTTGGTTCTGGCATCGATGAAGAACGCAGCGAAATGCGATAAGTAATGTGAATTGCAGAATTCAGTGAATCATCGAATCTTTGAACGCACATTGCGCCCATTAGTATTCTAGTGGGCATGCCTGTTCGAGCGTCATTTCAACCCTTAAGCCTAGCTTAGTGTTGGGAGCCTACTGCTTTT…
F8029	MK367496	Annulohypoxylon annulatum C8 (FJ481153)	99.83	615bp	TGGAACTAACGGGTACGCAAACTCCATAACCCTTTGTGAACCTACCTACTGTTGCCTCGGCGTCGCGCTGCGGCTGACGCCCGCCCCTACCCGCCCTACCCGGGAGAGGAGGGGGCGGGCCTCAGCCGGCTGAACCAGCCCGCCAAAGGACCTACAAACCAAACCCTAAATCAAACGTACCTTCTGAAGAATAAAAAAAAGAATCAACTTTGAAACTTAAATAAGTCAAAACTTTCAACAACGGATCTCTTGGCTCTGGCATCGATGAAGAACGCAGCGAAATGCGATAAGTAATGTGAATTGCAGAATTCAGTGAATCATCGAATCTTTGAACGCACATTGCGCCCGCCAGCATTCTGGCGGGCATGCCTATCCGAGCGTCATTACGACCCTTAAGCC…
F8030	MK367497	Hypoxylon sp.L28 (MG198900)	99.14	582bp	GGGGGCACTGGTATAAACTCCAACCCTTTGTGACCTTACCGTCGTTGCCTCGGCGTGAGCTACGGCTACCCTGTAGTTACCCTGTAGTTACCCTGTAGTTACCCTGCAGCTACCCTATAGTTACCCTGTAGCTACCCTGTAGCCGGCTTATGGCCCGCCGAAGGACCGCCAAACTCTTGTTTTTTATTACTGTTTCTCTGAATTGTAAACCTAAATAAGTTAAAACTTTCAACAACGGATCTCTTGGTTCTGGCATCGATGAAGAACGCAGCGAAATGCGATAAGTAATGTGAATTGCAGAATTCAGTGAATCATCGAATCTTTGAACGCACATTGCGCCCATTAGTATTCTAGTGGGCATGCCTATTCGAGCGTCATTTCGACCCTTAAGCCCTTGTT…
F8031	MK367498	Fusarium oxysporum YJTG-6 (MK673882)	100	496bp	TAACTCCCAAACCCCTGTGAACATACCACTTGTTGCCTCGGCGGATCAGCCCGCTCCCGGTAAAACGGGACGGCCCGCCAGAGGACCCCTAAACTCTGTTTCTATATGTAACTTCTGAGTAAAACCATAAATAAATCAAAACTTTCAACAACGGATCTCTTGGTTCTGGCATCGATGAAGAACGCAGCAAAATGCGATAAGTAATGTGAATTGCAGAATTCAGTGAATCATCGAATCTTTGAACGCACATTGCGCCCGCCAGTATTCTGGCGGGCATGCCTGTTCGAGCGTCATTTCAACCCTCAAGCACAGCTTGGTGTTGGGACTCGCGTTAATTCGCGTTCCTCAAATTGATTGGCGGTCACGTCGAGCTTCCATAGCGTAGTAGTAAAACCCTCG…
F8032	MK367499	Annulohypoxylon annulatum C15 (FJ481154)	100	614bp	GTGGGCTAGCGGTACGCAACTCCATAACCCTTTGTGAACCTACCTACTGTTGCCTCGGCGTCGCGCTGCGGCTGACGCCCGCCCCTACCCGCCCTACCCGGGAGAGGAGGGGGCGGGCCTCAGCCGGCTGAACCAGCCCGCCAAAGGACCTACAAACCAAACCCTAAATCAAACGTACCTTCTGAAGAATAAAAAAAAGAATCAACTTTGAAACTTAAATAAGTCAAAACTTTCAACAACGGATCTCTTGGCTCTGGCATCGATGAAGAACGCAGCGAAATGCGATAAGTAATGTGAATTGCAGAATTCAGTGAATCATCGAATCTTTGAACGCACATTGCGCCCGCCAGCATTCTGGCGGGCATGCCTATCCGAGCGTCATTACGACCCTTAAGCCCC…
F8033	MK367500	Hypoxylon fragiforme S85 (KT224863)	99.31	606bp	GGGAATCTGGTATTAAACTCCAACCCTTTGTGACCTTACCGTCGTTGCCTCGGCGTGAGCTACGGCTACCTTGTAGTTACCCTATAGTTACCCTGTAGTTACCCTGTAGTTACCCTGCAGCTACCCTATAGTTACCCTGTAGCTACCCTGTAGCCGGCTTATGGCCCGCCGAAGGACCGCCAAACTCTTGTTTTTTATTACTGTTTCTCTGAATTGTAAACCTAAATAAGTTAAAACTTTCAACAACGGATCTCTTGGTTCTGGCATCGATGAAGAACGCAGCGAAATGCGATAAGTAATGTGAATTGCAGAATTCAGTGAATCATCGAATCTTTGAACGCACATTGCGCCCATTAGTATTCTAGTGGGCATGCCTATTCGAGCGTCATTTCGACCCTT…
F8034	MK367501	Arthrinium arundinis isolate H19 MK539828	100	549bp	TGGGGGACAACGGAGTATACACTCCCATACCATCTGTTAACCTACCCAGTTATGCCTCGGCGTAAGCTCGGTTGGAGGCACCTGCAGCTACCCTGTAGTTGCGGACTGCCAACTCCAGCCGCGGCCCGCCGGCGGTACACTAAACTCTGTTTTATTTTATATTCTGAGCGTCTTATTTTAATAAGTTAAAACTTTCAACAACGGATCTCTTGGTTCTGGCATCGATGAAGAACGCAGCGAAATGCGATAAGTAATGTGAATTGCAGAATTCAGTGAATCATCGAATCTTTGAACGCACATTGCGCCCATCAGTATTCTGGTGGGCATGCCTGTTCGAGCGTCATTTCAACCCTTAAGCCTAGCTTAGTGTTGGGAATCTGCTGTACTGCAGTTCCTTAA…
F8035	MK367502	Arthrinium yunnanum JN2 (MH191120)	99.67	617bp	AAAGGAGCTTTACTCCCACACCATTTGTTAACCTACCACCTTATGCCTCGGCGTAAGCTCGGTTCGGGGGCGTTTCGTCGTCGAGTTACCCTGTGGCTGCCGTGTGGCTGCCTTGAGCTACCCTGTAGCGATTGGCTAGTTACCCTGTAGCTGCAATCTGGCTCTTCGACGGGACGCACTCCGGCCGCGGCCCGCCGGCGGTACACTAAACTCGTTTTTACCGTACATTCTGAGCGTCTTATTTTAAATAAGTTAAAACTTTCAACAACGGATCTCTTGGTTCTGGCATCGATGAAGAACGCAGCGAAATGCGATAAGTAATGTGAATTGCAGAATTCAGTGAATCATCGAATCTTTGAACGCACATTGCGCCCACTAGTATTCTGGTGGGCATGCCTG…
F8036	MK367503	Biscogniauxia sp. LPS-70 (MF379340)	98.91	559bp	GAATTGCGAGTATTACAACTCCAAACCCCTGTGAACTTACCCATGTTGCCTCGGCAGGTCGTGGCGTGTAGCGTGGTCCCTCGCGGGATCGCTGCCTCGCGCCACGCCAAAAGGCCTGTCAAAGGACCCCTAAAATCTGTCTTATTACTGCATCTCTGAGTTTATTATACAAACGAGTTAAAACTTTCAACAACGGATCTCTTGGCTCTGGCATCGATGAAGAACGCAGCGAAATGCGATAAGTAATGTGAATTGCAGAATTCAGTGAATCATCGAATCTTTGAACGCACATTGCGCCTGATAGTATTCTGTCAGGCATGCCTGTTCGAGCGTCATTTCAACCCCCAAGCCCTATTTGCTTGACGTTGGGAGTTTACGGAGACGTAATTCCTCAAATAT…
F8037	MK367504	Colletotrichum sp.Acf-5 (MK795218）	100	527bp	CTACACCCTTTGTGACATACCTAACCGTTGCTTCGGCGGGCAGGGGAAGCCTCTCGTGGGCGGACCCTCCCGGCGCCGGCCCCGTCACGGGGGCGGAGCGCCCGCCGGAGGAAACCAAACTCTATTTACACGACGTCTCTTCTGAGTGGCACAAGCAAATAATTAAAACTTTTAACAACGGATCTCTTGGTTCTGGCATCGATGAAGAACGCAGCGAAATGCGATAAGTAATGTGAATTGCAGAATTCAGTGAATCATCGAATCTTTGAACGCACATTGCGCTCGCCAGCATTCTGGCGAGCATGCCTGTTCGAGCGTCATTTCAACCCTCAAGCACCGCTTGGTTTTGGGGCCCCACGGCCGACGTGGGCCCTTAAAGGTAGTGGCGGACCCTCCCGG…
F8038	MK367505	Penicillium citrinum PcN21B02 (MK952563)	99.24	526bp	ATTCGGACTGCGGGCCTCGGGGCCCAACCTCCCACCCGTGTTGCCCGAACCTATGTTGCCTCGGCGGGCCCCGCGCCCGCCGACGGCCCCCCTGAACGCTGTCTGAAGTTGCAGTCTGAGACCTATAACGAAATTAGTTAAAACTTTCAACAACGGATCTCTTGGTTCCGGCATCGATGAAGAACGCAGCGAAATGCGATAACTAATGTGAATTGCAGAATTCAGTGAATCATCGAGTCTTTGAACGCACATTGCGCCCTCTGGTATTCCGGAGGGCATGCCTGTCCGAGCGTCATTGCTGCCCTCAAGCCCGGCTTGTGTGTTGGGCCCCGTCCCCCCCGCCGGGGGGACGGGCCCGAAAGGCAGCGGCGGCACCGCGTCCGGTCCTCGAGCGTATGG…
F8039	MK367506	Aspergillus sp. HF2 (KR081398)	99.8	525bp	TGCATCGGTGCGGGCTCTGGGTCACCTCCCATCCGTGTCTATCTGTACCCTGTTGCTTCGGCGTGGCCACGGCCCGCCGAAGACTAACATTTGAACACTGTCTGAAGTTTGCAGTCTGAGTTTTTAGTTAAACAATAATTAAAACTTTCAACAACGGATCTCTTGGTTCCGGCATCGATGAAGAACGCAGCGAAATGCGATAATTAATGTGAATTGCAGAATTCAGTGAATCATCGAGTCTTTGAACGCACATTGCGCCCCCTGGTATTCCGGGGGGCATGCCTGTCCGAGCGTCATTGCTGCCCTCAAGCACGGCTTGTGTGTTGGGCTTCCGTCCCTGGTAACGGGGACGGGCCCAAAAGGCAGTGGCGGCACCATGTCTGGTCCTCGAGCGTATGG…
F8040	MK367507	Aspergillus flavipes AfH14F02 (MK952227)	100	556bp	GGGATTCGAGTGTAGGTTCTAGCGAGCCCAACCTCCCACCCGTGTTTACTGTACCTTAGTTGCTTCGGCGGGCCCGCCATTCATGGCCGCCGGGGGCTCTCAGCCCCGGGCCCGCGCCCGCCGGAGACACCACGAACTCTGTCTGATCTAGTGAAGTCTGAGTTGATTGTATCGCAATCAGTTAAAACTTTCAACAATGGATCTCTTGGTTCCGGCATCGATGAAGAACGCAGCGAAATGCGATAACTAGTGTGAATTGCAGAATTCCGTGAATCATCGAGTCTTTGAACGCACATTGCGCCCCCTGGTATTCCGGGGGGCATGCCTGTCCGAGCGTCATTGCTGCCCATCAAGCACGGCTTGTGTGTTGGGTCGTCGTCCCCTCTCCGGGGGGGACGG…
F8041	MK367508	Cladosporium sp. SH1 (MH884069)	100	524bp	GACTTTAGTGACCGGTCTACCACCGGGATGTTCATAACCCTTTGTTGTCCGACTCTGTTGCCTCCGGGGCGACCCTGCCTTCGGGCGGGGGCTCCGGGTGGACACTTCAAACTCTTGCGTAACTTTGCAGTCTGAGTAAACTTAATTAATAAATTAAAACTTTTAACAACGGATCTCTTGGTTCTGGCATCGATGAAGAACGCAGCGAAATGCGATAAGTAATGTGAATTGCAGAATTCAGTGAATCATCGAATCTTTGAACGCACATTGCGCCCCCTGGTATTCCGGGGGGCATGCCTGTTCGAGCGTCATTTCACCACTCAAGCCTCGCTTGGTATTGGGCAACGCGGTCCGCCGCGTGCCTCAAATCGACCGGCTGGGTCTTCTGTCCCCTAAGCG…
F8042	MK367509	Aspergillus sp. MEFC129 (MK732143)	99.44	544bp	GTGCTTCTGAGTGCGGCTGCCTCCGGGCGCCCACCTCCCACCCGTGAATACCTAACACTGTTGCTTCGGCGGGGAACCCCCTCGGGGGCGAGCCGCCGGGGACTACTGAACTTCATGCCTGAGAGTGATGCAGTCTGAGTCTGAATATAAAATCAGTCAAAACTTTCAACAATGGATCTCTTGGTTCCGGCATCGATGAAGAACGCAGCGAACTGCGATAAGTAATGTGAATTGCAGAATTCAGTGAATCATCGAGTCTTTGAACGCACATTGCGCCCCCTGGCATTCCGGGGGGCATGCCTGTCCGAGCGTCATTGCTGCCCATCAAGCCCGGCTTGTGTGTTGGGTCGTCGTCCCCCCCGGGGGACGGGCCCGAAAGGCAGCGGCGGCACCGTGTCC…
F8043	MK367510	Aspergillus sydowii EN50 (FJ807779)	99.62	529bp	GGCTCTGATGCGGCTGCCTCCGGGCGCCCAACCTCCCACCCGTGAATACCTAACACTGTTGCTTCGGCGGGGAACCCCCTCGGGGGCGAGCCGCCGGGGACTACTGAACTTCATGCCTGAGAGTGATGCAGTCTGAGTCTGAATATAAAATCAGTCAAAACTTTCAACAATGGATCTCTTGGTTCCGGCATCGATGAAGAACGCAGCGAACTGCGATAAGTAATGTGAATTGCAGAATTCAGTGAATCATCGAGTCTTTGAACGCACATTGCGCCCCCTGGCATTCCGGGGGGCATGCCTGTCCGAGCGTCATTGCTGCCCATCAAGCCCGGCTTGTGTGTTGGGTCGTCGTCCCCCCCCGGGGGACGGGCCCGAAAGGCAGCGGCGGCACCGTGTCCG…
F8044	MK367511	Fusarium sp. JZ-Z7 (EF611090)	99.62	525bp	GGGGATTTCGAGTTTCACTCCCAACCCCTGTGACATACCTTAATGTTGCCTCGGCGGATCAGCCCGCGCCCCGTAAAACGGGACGGCCCGCCAGAGGACCCAAACTCTAATGTTTCTTATTGTAACTTCTGAGTAAAACAAACAAATAAATCAAAACTTTCAACAACGGATCTCTTGGTTCTGGCATCGATGAAGAACGCAGCAAAATGCGATAAGTAATGTGAATTGCAGAATTCAGTGAATCATCGAATCTTTGAACGCACATTGCGCCCGCTGGTATTCCGGCGGGCATGCCTGTTCGAGCGTCATTTCAACCCTCAAGCCCCCGGGTTTGGTGTTGGGGATCGGCTCTGCCTTCTGGCGGTGCCGCCCCCGAAATACATTGGCGGTCTCGCTGCA…
F8045	MK367512	Colletotrichum acutatum JS4 (KM513609)	100	557bp	GGGAATCTGAGTACGCTCTATACCCTTTGTGACGTACCTAACCGTTGCTTCGGCGGGCAGGGGAAGCCTCTCGCGGGCCTCCCCTCCCGGCGCCGGCCCCCACCACGGGGACGGGGCGCCCGCCGGAGGAAACCAAACTCTATTTACACGACGTCTCTTCTGAGTGGCACAAGCAAATAATTAAAACTTTTAACAACGGATCTCTTGGTTCTGGCATCGATGAAGAACGCAGCGAAATGCGATAAGTAATGTGAATTGCAGAATTCAGTGAATCATCGAATCTTTGAACGCACATTGCGCTCGCCAGCATTCTGGCGAGCATGCCTGTTCGAGCGTCATTTCAACCCTCAAGCACCGCTTGGTTTTGGGGCCCCACGGCCGACGTGGGCCCTTAAAGGT…
F8046	MK367513	Coniochaeta sp. isolate C4L-19Aa (MN538293)	98.71	547bp	GGGGAACTACGGAGGTCTAAAGACTCCCAAACCATTGTGAACCTACCCGTCAGCGTTGCCTCGGCGGGCGGCCCCTCCCTGGGGCCGCTGCCTCCCTCACGGGGGGTGCCCGCCGGCGTACGAAAACTCTTTTGTATTTTAGTGGCCTCTCTGAGAAAACAAGCAAATAAGTTAAAACTTTCAACAACGGATCTCTTGGTTCTGGCATCGATGAAGAACGCAGCGAAATGCGATAAGTAATGTGAATTGCAGAATTCAGTGAATCATCGAATCTTTGAACGCACATTGCGCCCGCTAGTACTCTAGCGGGCATGCCTGTTCGAGCGTCATTTCAACCCTCAAGCCCTGCTTGGTGTTGGGGTCCTACGGCTGCCGTAGGCCCTGAAAACTAGTGGCGGG…
F8047	MK367514	Nigrospora oryzae TS-46 (MG832466)	99.05	574bp	GGGGAATAGAGTTTCCACTCCCAACCCATGTGAACTTATCTCTTTGTTGCCTCGGCGCAAGCTACCCGGGACCCAGCGCCCCGGGCGGCCCGCCGGCGGACAAACCAAACTCTTGTTATTCAATGGATTATCTGAGCGTCTTATTTAATAAGTCAAAACTTTCAACAACGGATCTCTTGGTTCTGGCATCGATGAAGAACGCAGCGAAATGCGATAAGTAATGTGAATTGCAGAATTCAGTGAATCATCGAATCTTTGAACGCACATTGCGCCCATCAGTATTCTGGTGGGCATGCCTGTTCGAGCGTCATTTCAACCCCTAAGCACAGCTTACTGTTGGGACTCTACGGCCTCCGTAGTTCCCCAAAGCCATTGGCGGAGTGGCAGTAGTCCTCTGAG…
F8048	MK367515	Nemania sp. C516 genes LC168780	98.56	557bp	GGGGACTTAGGGTGTATACTCCCAACCCATGTGAACATACCTCATGTTGCCTCGGCAGGTCGCGCCTCCCTCGTAGGTCCTACCCTGTAGGCTCCTACCCGGAAGGCGCGGGTACCCCTGCCGGTGGCCCAGGAAACTCTGTCTCATCGTTGAATTCTGAACCTATAACTAAATAAGTTAAAACTTTCAACAACGGATCTCTTGGTTCTGGCATCGATGAAGAACGCAGCGAAATGCGATAAGTAATGTGAATTGCAGAATTCAGTGAATCATCGAATCTTTGAACGCACATTGCGCCCATTAGTATTCTAGTGGGCATGCCTGTTCGAGCGTCATTTCAACCCTTAAGCCCTTGTTGCTTAGCGTTGGGAGCCTACGGCACCGTAGCTCCCCAAAGTC…
F8049	MK367516	Nemania sp. C516 (LC168780)	98.56	557bp	GGGGACTTAGGGTGTATACTCCCAACCCATGTGAACATACCTCATGTTGCCTCGGCAGGTCGCGCCTCCCTCGTAGGTCCTACCCTGTAGGCTCCTACCCGGAAGGCGCGGGTACCCCTGCCGGTGGCCCAGGAAACTCTGTCTCATCGTTGAATTCTGAACCTATAACTAAATAAGTTAAAACTTTCAACAACGGATCTCTTGGTTCTGGCATCGATGAAGAACGCAGCGAAATGCGATAAGTAATGTGAATTGCAGAATTCAGTGAATCATCGAATCTTTGAACGCACATTGCGCCCATTAGTATTCTAGTGGGCATGCCTGTTCGAGCGTCATTTCAACCCTTAAGCCCTTGTTGCTTAGCGTTGGGAGCCTACGGCACCGTAGCTCCCCAAAGTC…
F8050	MK367517	Colletotrichum acutatum JS4 (KM513609)	100	546bp	GGGATTCTGAGTACGCTCTATACCCTTTGTGACGTACCTAACCGTTGCTTCGGCGGGCAGGGGAAGCCTCTCGCGGGCCTCCCCTCCCGGCGCCGGCCCCCACCACGGGGACGGGGCGCCCGCCGGAGGAAACCAAACTCTATTTACACGACGTCTCTTCTGAGTGGCACAAGCAAATAATTAAAACTTTTAACAACGGATCTCTTGGTTCTGGCATCGATGAAGAACGCAGCGAAATGCGATAAGTAATGTGAATTGCAGAATTCAGTGAATCATCGAATCTTTGAACGCACATTGCGCTCGCCAGCATTCTGGCGAGCATGCCTGTTCGAGCGTCATTTCAACCCTCAAGCACCGCTTGGTTTTGGGGCCCCACGGCCGACGTGGGCCCTTAAAGGT…
F8051	MK367518	Colletotrichum truncatum SS2-PS9(KP900286)	99.27	546bp	GGGGACTTCTGACTACGCTCTACACCCTTTGTGACATACCTAACTGTTGCTTCGGCGGGCAGAGGTCCCTCGCGGATCTCTCCCGGCAACGCCCTCACGGGCGGAGCGCCCGCCGGAGGATACCAAACTCTATTTTAACGACGTTTCTTCTGAGTGGCACAAGCAAATAATTAAAACTTTTAACAACGGATCTCTTGGTTCTGGCATCGATGAAGAACGCAGCGAAATGCGATAAGTAATGTGAATTGCAGAATTCAGTGAATCATCGAATCTTTGAACGCACATTGCGCCCGCCAGCATTCTGGCGGGCATGCCTGTTCGAGCGTCATTTCAACCCTCAAGCTCTGCTTGGTGTTGGGGCCCTACGGTTAACGTAGGCCCTTAAAGGTAGTGGCGGAC…
F8052	MK367519	Dactylonectria macrodidyma ZB11263597 (KX783337)	99.23	517bp	GTGGATTACGACTTCACTCCCAACCCCTGTGACATACCTATTTGTTGCCTCGGCGGTGCCTGTTCCGACAGCCCGCCAGAGGACCCCAAACCCTGATTACATTTAAGAAGTCTTCTGAGTAAACCGATTAAATAAATCAAAACTTTCAACAACGGATCTCTTGGTTCTGGCATCGATGAAGAACGCAGCGAAATGCGATAAGTAATGTGAATTGCAGAATTCAGTGAATCATCGAATCTTTGAACGCACATTGCGCCCGCTAGTATTCTGGCGGGCATGCCTGTCCGAGCGTCATTTCAACCCTCAAGCCCCCGGGCTTGGTGTTGGGGATCGGCGAGCCTCCGCGCCCGCCGTCCCCTAAATCTAGTGGCGGTCTCGCTGTAGCTTCCTCTGCGTAGT…
F8053	MK367520	Setophoma terrestris Setoph_t1 (MG944392)	99.6	513bp	ATTTCAAGTCAGTCGGGGGCTGCAAGCCTTCGTCTACACCCATGTCTTTTGCGTACTTCTTGTTTCCTCGGTGGCGCAAGCCGCCGATTGGACAAACCAAAACCTTTTTTGTAATTGCAATCAGCGTCTGAAAATAATCTAATTATTTACAACTTTCAACAACGGATCTCTTGGTTCTGGCATCGATGAAGAACGCAGCGAAATGCGATAAGTAGTGTGAATTGCAGAATTCAGTGAATCATCGAATCTTTGAACGCACATTGCGCCCCTTGGTATTCCATGGGGCATGCCTGTTCGAGCGTCATTTGTACCCTCAAGCTTTGCTTGGTGTTGGGCGTCTTGTCGTATTACGACTCGCCTTAAATACATTGGCAGCCGGCACTTTGGCCTAGGAGCGCA…
F8054	MK367521	Dactylonectria macrodidyma ZB11263597 (KX783337)	99.21	521bp	GGGAATACGAGGTCACTCCCAACCCCTGTGACATACCTATTTGTTGCCTCGGCGGTGCCTGTTCCGACAGCCCGCCAGAGGACCCCAAACCCTGATTACATTTAAGAAGTCTTCTGAGTAAACCGATTAAATAAATCAAAACTTTCAACAACGGATCTCTTGGTTCTGGCATCGATGAAGAACGCAGCGAAATGCGATAAGTAATGTGAATTGCAGAATTCAGTGAATCATCGAATCTTTGAACGCACATTGCGCCCGCTAGTATTCTGGCGGGCATGCCTGTCCGAGCGTCATTTCAACCCTCAAGCCCCCGGGCTTGGTGTTGGGGATCGGCGAGCCTCCGCGCCCGCCGTCCCCTAAATCTAGTGGCGGTCTCGCTGTAGCTTCCTCTGCGTAGTA…
F8055	MK367522	Dactylonectria macrodidyma ZB11263597 (KX783337)	99.04	523bp	GGGAATACGAGTTCACTCCCAACCCCTGTGAACATACCTATTTGTTGCCTCGGCGGTGCCTGTTCCGACAGCCCGCCAGAGGACCCCAAACCCTGATTACATTTAAGAAGTCTTCTGAGTAAACCGATTAAATAAATCAAAACTTTCAACAACGGATCTCTTGGTTCTGGCATCGATGAAGAACGCAGCGAAATGCGATAAGTAATGTGAATTGCAGAATTCAGTGAATCATCGAATCTTTGAACGCACATTGCGCCCGCTAGTATTCTGGCGGGCATGCCTGTCCGAGCGTCATTTCAACCCTCAAGCCCCCGGGCTTGGTGTTGGGGATCGGCGAGCCTCCGCGCCCGCCGTCCCCTAAATCTAGTGGCGGTCTCGCTGTAGCTTCCTCTGCGTAGT…
F8056	MK367523	Phoma sp. 135 (KY484799)	95.09	528bp	GGGGAAAAGAGCGCAAGCCTCTGCGCGCGGCGGCCCACCAGCTGCCGCACGCACGCCTTGCATCCTCGATATTACAGCACCTTGCGTTCTCCTTCGGCGGGTCGACCCGCCGTCGGAACCAAAACATTCTTTGCTCGCAGCAATACCCGTTCCGAAACAAACAATCGTTACAACTTTCAACAATGGATCTCTTGGCTCTGGCATCGATGAAGAACGCAGCGAAATGCGATAAGTAGTGTGAATTGCAGAATTCAGTGAATCATCGAATCTTTGAACGCACATTGCGCCCCTCGGTATTCCGTGGGGCATGCCTGTTCGAGCGTCATCTACACCCTCAAGCCCTGCTTGGTGTTGGGTGCCTGTCCCGCCCCGCGCGGCGACTCACCCCAAATGCATTGG…
F8058	MK367524	Dactylonectria macrodidyma HUGI11 (MK183814)	99.03	518bp	GTGGGACTACGACTAACTCCAACCCCTGTGACATACCTATTTGTTGCCTCGGCGGTGCCTGTTCCGACAGCCCGCCAGAGGACCCCAAACCCTGATTACATTTAAGAAGTCTTCTGAGTAAACCGATTAAATAAATCAAAACTTTCAACAACGGATCTCTTGGTTCTGGCATCGATGAAGAACGCAGCGAAATGCGATAAGTAATGTGAATTGCAGAATTCAGTGAATCATCGAATCTTTGAACGCACATTGCGCCCGCTAGTATTCTGGCGGGCATGCCTGTCCGAGCGTCATTTCAACCCTCAAGCCCCCGGGCTTGGTGTTGGGGATCGGCGAGCCTCCGCGCCCGCCGTCCCCTAAATCTAGTGGCGGTCTCGCTGTAGCTTCCTCTGCGTAGTA…
F8059	MK367525	Fusarium proliferatum LrBF41 (MG543759)	99.81	521bp	GGGGGGATACGGAGCTTCACTCCCAACCCCTGTGACATACCAATTGTTGCCTCGGCGGATCAGCCCGCTCCCGGTAAAACGGGACGGCCCGCCAGAGGACCCCTAAACTCTGTTTCTATATGTAACTTCTGAGTAAAACCATAAATAAATCAAAACTTTCAACAACGGATCTCTTGGTTCTGGCATCGATGAAGAACGCAGCAAAATGCGATAAGTAATGTGAATTGCAGAATTCAGTGAATCATCGAATCTTTGAACGCACATTGCGCCCGCCAGTATTCTGGCGGGCATGCCTGTTCGAGCGTCATTTCAACCCTCAAGCCCCCGGGTTTGGTGTTGGGGATCGGCGAGCCCTTGCGGCAAGCCGGCCCCGAAATCTAGTGGCGGTCTCGCTGCAGC…
F8060	MK367526	Dactylonectria macrodidyma ZB11263597 (KX783337)	99.4	517bp	GGGGGCTCGACTAACTCCCAACCCCTGTGAACATACCTATTTGTTGCCTCGGCGGTGCCTGTTCCGACAGCCCGCCAGAGGACCCCAAACCCTGATTACATTTAAGAAGTCTTCTGAGTAAACCGATTAAATAAATCAAAACTTTCAACAACGGATCTCTTGGTTCTGGCATCGATGAAGAACGCAGCGAAATGCGATAAGTAATGTGAATTGCAGAATTCAGTGAATCATCGAATCTTTGAACGCACATTGCGCCCGCTAGTATTCTGGCGGGCATGCCTGTCCGAGCGTCATTTCAACCCTCAAGCCCCCGGGCTTGGTGTTGGGGATCGGCGAGCCTCCGCGCCCGCCGTCCCCTAAATCTAGTGGCGGTCTCGCTGTAGCTTCCTCTGCGTAGTA…
F8061	MK367527	Dactylonectria macrodidyma ZB11263597 (KX783337)	99.6	516bp	GGGAATACGACTTCACTCCCAACCCCTGTGACATACCTATTTGTTGCCTCGGCGGTGCCTGTTCCGACAGCCCGCCAGAGGACCCCAAACCCTGATTACATTTAAGAAGTCTTCTGAGTAAACCGATTAAATAAATCAAAACTTTCAACAACGGATCTCTTGGTTCTGGCATCGATGAAGAACGCAGCGAAATGCGATAAGTAATGTGAATTGCAGAATTCAGTGAATCATCGAATCTTTGAACGCACATTGCGCCCGCTAGTATTCTGGCGGGCATGCCTGTCCGAGCGTCATTTCAACCCTCAAGCCCCCGGGCTTGGTGTTGGGGATCGGCGAGCCTCCGCGCCCGCCGTCCCCTAAATCTAGTGGCGGTCTCGCTGTAGCTTCCTCTGCGTAGTA…
F8062	MK367528	Dactylonectria macrodidyma ZB11263597 (KX783337)	98.84	516bp	GTGGGCTACGACTAACTCCCAACCCCTGTGACATACCTATTTGTTGCCTCGGCGGTGCCTGTTCCGACAGCCCGCCAGAGGACCCCAAACCCTGATTACATTTAAGAAGTCTTCTGAGTAAACCGATTAAATAAATCAAAACTTTCAACAACGGATCTCTTGGTTCTGGCATCGATGAAGAACGCAGCGAAATGCGATAAGTAATGTGAATTGCAGAATTCAGTGAATCATCGAATCTTTGAACGCACATTGCGCCCGCTAGTATTCTGGCGGGCATGCCTGTCCGAGCGTCATTTCAACCCTCAAGCCCCCGGGCTTGGTGTTGGGGATCGGCGAGCCTCCGCGCCCGCCGTCCCCTAAATCTAGTGGCGGTCTCGCTGTAGCTTCCTCTGCGTAGTA…
F8064	MK367529	Peniophora cinerea SWFC 009254 (MK894054)	98.19	611bp	TGGCTTTGCGAGCTCGGATGCGTGTTTGGTCTGATGCTGCCCAGCGATGGGATGTGCTCGTCCGGATGCGTGTCCCTTCTCTATTCCACCCCTTTGTGAACCAAGTGTGCGAGCCGAAGAGAGATCGGAGGCTCGCATGCAACCCTTAACATACCCCCATGAAGTATCAGAATGTACCTTGCGTTAACTCGCACAAATACAACTTTCAACAACGGATCTCTTGGCTCTCGCATCGATGAAGAACGCAGCGAAATGCGATAAGTAATGTGAATTGCAGAATTCAGTGAATCATCGAATCTTTGAACGCACCTTGCGCCCCTTGGCATTCCGAGGGGCACGCCTGTTTGAGTGTCGTGAACTCCTCCACCCTCCACCTTTTTCGGAAGGCGTTGGGCTGGG…
F8066	MK367530	Fusarium oxysporum CEF-068 (KF998987)	99.81	517bp	GCGGGCTCGAGCATCACTCCCAACCCCTGTGACATACCACTTGTTGCCTCGGCGGATCAGCCCGCTCCCGGTAAAACGGGACGGCCCGCCAGAGGACCCCTAAACTCTGTTTCTATATGTAACTTCTGAGTAAAACCATAAATAAATCAAAACTTTCAACAACGGATCTCTTGGTTCTGGCATCGATGAAGAACGCAGCAAAATGCGATAAGTAATGTGAATTGCAGAATTCAGTGAATCATCGAATCTTTGAACGCACATTGCGCCCGCCAGTATTCTGGCGGGCATGCCTGTTCGAGCGTCATTTCAACCCTCAAGCACAGCTTGGTGTTGGGACTCGCGTTAATTCGCGTTCCCCAAATTGATTGGCGGTCACGTCGAGCTTCCATAGCGTAGTAG…
F8067	MK367531	Nemania serpens BHI-F650a (MF161316)	96.06	562bp	ATTTGAGTTATCAAACTCCCAAACCCATGTGAACATACCTCGCGTTGCCTCGGCAGGTGGCGTCTCGCCCCGTAAGGTGCTACCCTGTAGGGTCTTACCCGGTAGACGACCCTGCCGACGGCCCTCGAAACTCTGTTTTTATAACATTAGACTTCTGAAAAGATAACTAAATAAGTTAAAACTTTCAACAACGGATCTCTTGGTTCTGGCATCGATGAAGAACGCAGCGAAATGCGATAAGTAATGTGAATTGCAGAATTCAGTGAATCATCGAATCTTTGAACGCACATTGCGCCCACCAGTATTCTGGTGGGCATGCCTGTTCGAGCGTCATTTCAACCCTTAAGCCCCTGTTGCTTAGCGTTGGGAGCCTACTGGACCTTGTCCGGTAGCTCCCCA…
F8068	MK367532	Chaetomium sp. OTU460 (GU934510)	98.03	521bp	GGGGATTAGAGTGCACTCCCAACCATTGTGAACTTACCTTCAACGTTGCTTCGGCGGGTCGGCTCCGGGTCTCCCGGGGCCGCCCGGCCCTCACGGGCGCCCGCCGGAGGTACCTAACTCTTGAAATTGTGGCCTCTCTGAGTGATTTATAAATAAGTCAAAACTTTCAACAACGGATCTCTTGGTTCTGGCATCGATGAAGAACGCAGCGAAATGCGATAAGTAATGTGAATTGCAGAATTCAGTGAATCATCGAATCTTTGAACGCACATTGCGCCCGCCAGTATTCTGGCGGGCATGCCTGTTCGAGCGTCATTTCAACCATCAAGCCCCCGGCTTGTGTTGGGGACCTGCGGCTGCCGCAGGCCCTGAAAACCAGTGGCGGGCTCGCTAGTCACT…
F8069	MK367533	Fusarium oxysporum M0620.1030-A5 (KT215404)	99.4	502bp	GGGGCTCGAGTAACTCCAACCCCTGTGACATACCACTTGTTGCCTCGGCGGATCAGCCCGCTCCCGGTAAAACGGGACGGCCCGCCAGAGGACCCCTAAACTCTGTTTCTATATGTAACTTCTGAGTAAAACCATAAATAAATCAAAACTTTCAACAACGGATCTCTTGGTTCTGGCATCGATGAAGAACGCAGCAAAATGCGATAAGTAATGTGAATTGCAGAATTCAGTGAATCATCGAATCTTTGAACGCACATTGCGCCCGCCAGTATTCTGGCGGGCATGCCTGTTCGAGCGTCATTTCAACCCTCAAGCACAGCTTGGTGTTGGGACTCGCGTTAATTCGCGTTCCTCAAATTGATTGGCGGTCACGTCGAGCTTCCATAGCGTAGTAGTAAA…
F8070	MK367534	Fusarium oxysporum FJDO-2 (MK880500)	100	505bp	GCGGAATTCGGTAACTCCCAACCCCTGTGACATACCACTTGTTGCCTCGGCGGATCAGCCCGCTCCCGGTAAAACGGGACGGCCCGCCAGAGGACCCCTAAACTCTGTTTCTATATGTAACTTCTGAGTAAAACCATAAATAAATCAAAACTTTCAACAACGGATCTCTTGGTTCTGGCATCGATGAAGAACGCAGCAAAATGCGATAAGTAATGTGAATTGCAGAATTCAGTGAATCATCGAATCTTTGAACGCACATTGCGCCCGCCAGTATTCTGGCGGGCATGCCTGTTCGAGCGTCATTTCAACCCTCAAGCACAGCTTGGTGTTGGGACTCGCGTTAATTCGCGTTCCCCAAATTGATTGGCGGTCACGTCGAGCTTCCATAGCGTAGTAGTA…
F8071	MK367535	Nectria haematococca WBS003 (KU350718)	99.62	538bp	TCCGGGCTTTTTCACTCATCAACCCTGTGACATACCTAAACGTTGCTTCGGCGGGAACAGACGGCCCCGTGAAACGGGCCGCCCCCGCCAGAGGACCCCTAACTCTGTTTCTATAATGTTTCTTCTGAGTAAAACAAGCAAATAAATTAAAACTTTCAACAACGGATCTCTTGGCTCTGGCATCGATGAAGAACGCAGCGAAATGCGATAAGTAATGTGAATTGCAGAATTCAGTGAATCATCGAATCTTTGAACGCACATTGCGCCCGCCAGTATTCTGGCGGGCATGCCTGTTCGAGCGTCATTACAACCCTCAGGCCCCCGGGCCTGGCGTTGGGGATCGGCGGAGCCCCCCGTGGGCACACGCCGTCCCCCAAATACAGTGGCGGTCCCGCCGCA…
F8072	MK367536	Mortierella alpina isolate 20B1 (KY825119)	99.08	652bp	ATTCTTAATCAAGTGTTTTTATGGCACTTTTAAAAAATCCATATCCACCTTGTGTGCAATGTCATCTCACTGGAGGCCAGCGGCTGTAAAAAGCCCGTTTGGTCACCTTTGGGATTTATATCTACTCAGAACTTTAGTGATTTTGTCTGAAAAATATTATGAATAACTTAATTCAAAATACAACTTTCAACAACGGATCTCTTGGCTCTCGCATCGATGAAGAACGCAGCGAAATGCGATACGTAATGTGAATTGCAGAATTCAGTGAATCATCGAATCTTTGAACGCATATTGCGCTCTCTGGTATTCCGGAGAGCATGCTTGTTTGAGTATCAGTAAACACCTCAACTCCCTTTTCTTTTTTGAAATGGGAGCTGGACTTGAGTGATCCCAACACTT…
F8073	MK367537	Cylindrocarpon olidum LrBF4 (MG543722)	99.82	570bp	GGGGGATTTCGGGTTTTCACTCCAACCCCTGTGACATACCATTACCGTTGCTTCGGCGGACCACCCCGACCCCTACGGGGCGAAGGGCCCGCCAGAGGACACCTAAAATTCAAATGCATTTTGCCCTGAAAATTTTATTCTGAGTGGAATTTTTAAATAAATCAAAACTTTCAACAACGGATCTCTTGGCTCTGGCATCGATGAAGAACGCAGCGAAATGCGATAAGTAATGTGAATTGCAGAATTCAGTGAACCATCGAATCTTTGAACGCACATTGCGCCCGCCAGTATTCTGGCGGGCATGCCTGTTCGAGCGTCATTTCAACCCTCAAGCCCCCGGGCTTGGTGTTGGGGATCGGCACAAGGCGCTGGCACCTCCGGGAGCCGCGCGCGCCCGCC…
F8074	MK367538	Trichoderma sp. yi0451_1 (MH284742)	99.49	592bp	GGGAAATTCGAGCTTCACTCCAACCCCTATGTGAACGTTACCAAAATGTTGCCTCGGCGGGGAATTTATTCATGCCCCGGGCGCGTCGCAGCCCCGGACCAAGGCGCCCGCCGGAGGACCAACCAAAACTCTTTTGTATGTCCCCTCGCGGACTTTTATAATTCTGAACCATCTCGGCGCCCCTAGCGGGCGTTTCGAAAATGAATCAAAACTTTCAACAACGGATCTCTTGGTTCTGGCATCGATGAAGAACGCAGCGAAATGCGATAAGTAATGTGAATTGCAGAATTCAGTGAATCATCGAATCTTTGAACGCACATTGCGCCCGCCAGTATTCTGGCGGGCATGCCTGTCCGAGCGTCATTTCAACCCTCGAACCCCTCCGGGGGTACGGCGTTG…
F8075	MK367539	Clitopilus sp. 1 T-780 (KC176286)	99.38	653bp	GGGGCTTTTGATACTTGGTCAGCTGTTGCTGGTCCCTCGGGGCATGTGCACGCTTGCCACCAATTTTAACCACCTGTGCACCTTTTGTAGATTGGAAACGTTTCTCGAGGCAACTCGGATTGAGGACTGCTGTGCGCAAGCCGGCTGTTCTTGTGTTTCTCAATCTATGTTTTCATATACTCCAAATGTATGTATCAGAATGTATTGTTAGGCCTCTGTGCCTTTAAATCAAATACAACTTTCAACAACGGATCTCTTGGCTCTCGCATCGATGAAGAACGCAGCGAAATGCGATAAGTAATGTGAATTGCAGAATTCAGTGAATCATCGAATCTTTGAACGCACCTTGCGCTCCTTGGTATTCCGAGGAGCATGCCTGTTTGAGTGTCATTAAATTCT…
F8076	MK367540	Fusarium solani LrBF21 (MG543739)	99.62	539bp	GGAAATTCGAGTTTCACTCATCAACCCTGTGACATACCTAAAACGTTGCTTCGGCGGGAACAGACGGCCCTGTAACAACGGGCCGCCCCCGCCAGAGGACCCCTAACTCTGTTTTTATAATGTTTTTCTGAGTAAACAAGCAAATAAATTAAAACTTTCAACAACGGATCTCTTGGCTCTGGCATCGATGAAGAACGCAGCGAAATGCGATAAGTAATGTGAATTGCAGAATTCAGTGAATCATCGAATCTTTGAACGCACATTGCGCCCGCCAGTATTCTGGCGGGCATGCCTGTTCGAGCGTCATTACAACCCTCAGGCCCCCGGGCCTGGCGTTGGGGATCGGCAGAAGCCCCCTGTGGGCACACGCCGTCCCTCAAATACAGTGGCGGTCCCGCC…
F8077	MK367541	Aspergillus pseudoglaucus FJAT-31014 (MF044049)	99.04	527bp	GGGATACGAGTGCGGGCTCTGGGTCACCTCCCATCCGTGTCTATCTGTACCCTGTTGCTTCGGCGTGGCCACGGCCCGCCGAAGACTAACATTTGAACACTGTCTGAAGTTTGCAGTCTGAGTTTTTAGTTAAACAATAATTAAAACTTTCAACAACGGATCTCTTGGTTCCGGCATCGATGAAGAACGCAGCGAAATGCGATAATTAATGTGAATTGCAGAATTCAGTGAATCATCGAGTCTTTGAACGCACATTGCGCCCCCTGGTATTCCGGGGGGCATGCCTGTCCGAGCGTCATTGCTGCCCTCAAGCACGGCTTGTGTGTTGGGCTTCCGTCCCTGGTAACGGGGACGGGCCCAAAAGGCAGTGGCGGCACCATGTCTGGTCCTCGAGCGTAT…
F8078	MK367542	Perenniporia medulla-panis isolate CNUZ-B420 (KX778660)	100	578bp	CTTCCTTTGGCTGCCGTGAGCGCTTCGGCGTGAGCGACAGTCATTTTCTAGTGACGCCTCCGTGTCCGGGAAACCGGCGCGGGGCTGACCTAACCCTTCTCTACGAGTACCTATTATTCTCCTTCGGCGGGGTCTACCCGCCGCTGGAACTTAAGAACCAACTTGCATTTAGCATTACCTGTTCTGATAACAATTAATTATTACAACTTTCAACAATGGATCTCTTGGCTCTGGCATCGATGAAGAACGCAGCGAAATGCGATAAGTAGTGTGAATTGCAGAATTCAGTGAATCATCGAATCTTTGAACGCACATTGCGCCCCATGGTATTCCGTGGGGCATGCCTGTTCGAGCGTCATCTACACCCTCAAGCACTGCTTGGTGTTGGGCGTCTGTCCC…
F8079	MK367543	Nemania serpens BHI-F650a (MF161316)	95.53	554bp	GGGGGCTTAAGAGCTTCAAACTCCCAACCCATGTGAACATACCTCGCGTTGCCTCGGCAGGTGGCGTCTCGCCCCGTAAGGTGCTACCCTGTAGGGTCTTACCCGGTAGACGACCCTGCCGACGGCCCTCGAAACTCTGTTTTTATAACATTAGACTTCTGAAAAGATAACTAAATAAGTTAAAACTTTCAACAACGGATCTCTTGGTTCTGGCATCGATGAAGAACGCAGCGAAATGCGATAAGTAATGTGAATTGCAGAATTCAGTGAATCATCGAATCTTTGAACGCACATTGCGCCCACCAGTATTCTGGTGGGCATGCCTGTTCGAGCGTCATTTCAACCCTTAAGCCCCTGTTGCTTAGCGTTGGGAGCCTACTGGACCTTGTCCGGTAGCTC…
F8080	MK367544	Chaetomium nigricolor Dzf15 (EU543258)	99.25	539bp	TGGGAACTTCGAGTTGCAAACTCCCAACCATTGTGAACGTTACCATTATCGTTGCTTCGGCGGGCGGCGCCCAGCGCTCCCAGGCCCCCTCGCGGGGCGCCCGCCGGAGGTTATCTAACTCTTGACAACTGTATGGCCTCTCTGAGTCTCTATACTTAATAAGTTAAAACTTTCAACAACGGATCTCTTGGTTCTGGCATCGATGAAGAACGCAGCGAAATGCGATAAGTAATGTGAATTGCAGAATTCAGTGAATCATCGAATCTTTGAACGCACATTGCGCCCGCCAGTATTCTGGCGGGCATGCCTGTTCGAGCGTCATTTCAACCATCAAGCCCCAGGCTTGTGTTGGGGACCTGCGGCTGCCGCAGGCCCTGAAAACCAGTGGCGGGCTCGCTA…
F8081	MK367545	Fusarium oxysporum FUS-33 (MH879861)	99.8	507bp	TAAACTCCCAAACCCCTGTGACATACCACTTGTTGCCTCGGCGGATCAGCCCGCTCCCGGTAAAACGGGACGGCCCGCCAGAGGACCCCTAAACTCTGTTTCTATATGTAACTTCTGAGTAAAACCATAAATAAATCAAAACTTTCAACAACGGATCTCTTGGTTCTGGCATCGATGAAGAACGCAGCAAAATGCGATAAGTAATGTGAATTGCAGAATTCAGTGAATCATCGAATCTTTGAACGCACATTGCGCCCGCCAGTATTCTGGCGGGCATGCCTGTTCGAGCGTCATTTCAACCCTCAAGCACAGCTTGGTGTTGGGACTCGCGTTAATTCGCGTTCCTCAAATTGATTGGCGGTCACGTCGAGCTTCCATAGCGTAGTAGTAAAACCCTCG…
F8082	MK367546	Aspergillus flavus A118P (MN095156)	99.82	570bp	GGGGCTTCGAGTGTAGGGTTCTAGCGAGCCCAACCTCCCACCCGTGTTTACTGTACCTTAGTTGCTTCGGCGGGCCCGCCATTCATGGCCGCCGGGGGCTCTCAGCCCCGGGCCCGCGCCCGCCGGAGACACCACGAACTCTGTCTGATCTAGTGAAGTCTGAGTTGATTGTATCGCAATCAGTTAAAACTTTCAACAATGGATCTCTTGGTTCCGGCATCGATGAAGAACGCAGCGAAATGCGATAACTAGTGTGAATTGCAGAATTCCGTGAATCATCGAGTCTTTGAACGCACATTGCGCCCCCTGGTATTCCGGGGGGCATGCCTGTCCGAGCGTCATTGCTGCCCATCAAGCACGGCTTGTGTGTTGGGTCGTCGTCCCCTCTCCGGGGGGGAC…
F8084	MK367547	Peniophora cinerea SWFC 00925 (MK894054)	98.52	613bp	GGGCTTGCGAGCTCGGATGCGTGTTCGGTCTGATGCTGCCCAGCAATGGGATGTGCTCGTCCGGATGCGTGTCCCTTCTCTATTCCACCCCTTTGTGAACCAAGTGTGCGAGCCGAAGAGAGATCGGAGGCTCGCATGCAAACCCTTAACATACCCCAATAAAGTATCAGAATGTACCTTGCGTTAACTCGCACAAATACAACTTTCAACAACGGATCTCTTGGCTCTCGCATCGATGAAGAACGCAGCGAAATGCGATAAGTAATGTGAATTGCAGAATTCAGTGAATCATCGAATCTTTGAACGCACCTTGCGCCCCTTGGCATTCCGAGGGGCACGCCTGTTTGAGTGTCGTGAACTCCTCCACCCTCCACCTTTTTCGGAAGGCGTTGGGCTGGG…
F8085	MK367548	Dactylonectria macrodidyma ZB11263597 (KX783337)	98.46	517bp	GGGGGAAAACGACTCACTCCAACCCCTGTGAACATACCTATTTGTTGCCTCGGCGGTGCCTGTTCCGACAGCCCGCCAGAGGACCCCAAACCCTGATTACATTTAAGAAGTCTTCTGAGTAAACCGATTAAATAAATCAAAACTTTCAACAACGGATCTCTTGGTTCTGGCATCGATGAAGAACGCAGCGAAATGCGATAAGTAATGTGAATTGCAGAATTCAGTGAATCATCGAATCTTTGAACGCACATTGCGCCCGCTAGTATTCTGGCGGGCATGCCTGTCCGAGCGTCATTTCAACCCTCAAGCCCCCGGGCTTGGTGTTGGGGATCGGCGAGCCTCCGCGCCCGCCGTCCCCTAAATCTAGTGGCGGTCTCGCTGTAGCTTCCTCTGCGTAGT…
F8086	MK367549	Trichoderma citrinoviride D1 (KY031343)	99.5	599bp	TAAACTACCCAAACCCAATGTGAACGTTACCAATCTGTTGCCTCGGCGGGATTCTCTGCCCCGGGCGCGTCGCAGCCCCGGATCCCATGGCGCCCGCCGGAGGACCAACTCAAACTCTTTTTTCTCTCCGTCGCGGCCTACGTCGCGGCTCTGTTTTATTTTTGCTCTGAGCCTTTCTCGGCGACCCTAGCGGGCGTCTCGAAAATGAATCAAAACTTTCAACAACGGATCTCTTGGTTCTGGCATCGATGAAGAACGCAGCGAAATGCGATAAGTAATGTGAATTGCAGAATTCAGTGAATCATCGAATCTTTGAACGCACATTGCGCCCGCCAGTATTCTGGCGGGCATGCCTGTCCGAGCGTCATTTCAACCCTCGAACCCCTCCGGGGGGTCGGC…
F8087	MK367550	Alternaria alternata ITCC-4312 (MH084279)	100	531bp	GGGGATTTCAATATGATGCGGGCTGGACCTCTCGGGGTTACAGCCTTGCTGAATTATTCACCCTTGTCTTTTGCGTACTTCTTGTTTCCTTGGTGGGTTCGCCCACCACTAGGACAAACATAAACCTTTTGTAATTGCAATCAGCGTCAGTAACAAATTAATAATTACAACTTTCAACAACGGATCTCTTGGTTCTGGCATCGATGAAGAACGCAGCGAAATGCGATAAGTAGTGTGAATTGCAGAATTCAGTGAATCATCGAATCTTTGAACGCACATTGCGCCCTTTGGTATTCCAAAGGGCATGCCTGTTCGAGCGTCATTTGTACCCTCAAGCTTTGCTTGGTGTTGGGCGTCTTGTCTCTAGCTTTGCTGGAGACTCGCCTTAAAGTAATTGGC…
F8088	MK367551	Colletotrichum sp. Acf-5 (MK795218）	99.81	543bp	GTGGATACTGACTACGCTCTACACCCTTTGTGACATACCTAACCGTTGCTTCGGCGGGCAGGGGAAGCCTCTCGTGGGCGGACCCTCCCGGCGCCGGCCCCGTCACGGGGGCGGAGCGCCCGCCGGAGGAAACCAAACTCTATTTACACGACGTCTCTTCTGAGTGGCACAAGCAAATAATTAAAACTTTTAACAACGGATCTCTTGGTTCTGGCATCGATGAAGAACGCAGCGAAATGCGATAAGTAATGTGAATTGCAGAATTCAGTGAATCATCGAATCTTTGAACGCACATTGCGCTCGCCAGCATTCTGGCGAGCATGCCTGTTCGAGCGTCATTTCAACCCTCAAGCACCGCTTGGTTTTGGGGCCCCACGGCCGACGTGGGCCCTTAAAGGT…
F8089	MK367552	Xylaria sp. DOF-36 (KX611659)	99.08	547bp	TTGGGCTAGAGTATTACACTCCTAACCCATGTGAACCTTACCATTTGTTGCCTCGGCAGGTCGCAGCTTACCCTGTGAGGCCCTACCCTGTAGGGCCTTACCTGGCAGTTGCGGGTAATCCTGCCGGTGGTCTACCAAACTCTGTTTACCATGATATTCTGAATACTATAACTAAATAAGTTAAAACTTTCAACAACGGATCTCTTGGTTCTGGCATCGATGAAGAACGCAGCGAAATGCGATAAGTAATGTGAATTGCAGAATTCAGTGAATCATCGAATCTTTGAACGCACATTGCGCCCATTAGTATTCTAGTGGGCATGCCTGTTCGAGCGTCATTTCAACCCTTAAGCCCCTGTTGCTTAGTGTTGGGAGCCTACAGCCTTCTGTAGCTCCTCA…
F8090	MK367553	Colletotrichum liriopes LrRF3 (MG543776)	99.09	554bp	GGGGCTACTGAGTACGCTCTATACCCTTTGTGACATACCTAACTGTTGCTTCGGCGGGCAGGGGGTCCCCTCGGGGACGCCCTCCCGGCCACGCCCTTCGCGGGGCGAGGCGCCCGCCGGAGGATACCAAACTCTATTTTAACGACGTTTCTTCTGAGTGGCACAAGCAAATAATTAAAACTTTTAACAACGGATCTCTTGGTTCTGGCATCGATGAAGAACGCAGCGAAATGCGATAAGTAATGTGAATTGCAGAATTCAGTGAATCATCGAATCTTTGAACGCACATTGCGCCCGCCAGCATTCTGGCGGGCATGCCTGTTCGAGCGTCATTTCAACCCTCAAGCTCTGCTTGGTGTTGGGGCCCTACGGTTGACGTAGGCCCTTAAAGGTAGTGGC…
F8091	MK367554	Penicillium chrysogenum SCSGAF0049 (JN851002)	100	563bp	TTGTCTTGCGGAGTGAGGCTCTGGGTCACCTCCCACCCGTGTTTATTTTACCTTGTTGCTTCGGCGGGCCCGCCTTAACTGGCCGCCGGGGGGCTTACGCCCCCGGGCCCGCGCCCGCCGAAGACACCCTCGAACTCTGTCTGAAGATTGTAGTCTGAGTGAAAATATAAATTATTTAAAACTTTCAACAACGGATCTCTTGGTTCCGGCATCGATGAAGAACGCAGCGAAATGCGATACGTAATGTGAATTGCAAATTCAGTGAATCATCGAGTCTTTGAACGCACATTGCGCCCCCTGGTATTCCGGGGGGCATGCCTGTCCGAGCGTCATTGCTGCCCTCAAGCACGGCTTGTGTGTTGGGCCCCGTCCTCCGATCCCGGGGGACGGGCCCGAAAG…
F8092	MK367555	Talaromyces funiculosus (KM457629)	98.56	553bp	AATTCCGAGTGCGGTCTCGCGGCCACCTCCCACCCTTGTCTCTCTACACCTGTTGCTTTGGCGGGCCCACTGGGGCTCCCTGGTCGCCGGGGGACACCCGTCCCCGGGCCCGCGCCCGCCGAAGCGCTTCGTGAACCCTGATGAAGAAGGGCTGTCTGAGTACTATGAAAATTGTCAAAACTTTCAACAATGGATCTCTTGGTTCCGGCATCGATGAAGAACGCAGCGAAATGCGATAAGTAATGTGAATTGCAGAATTCCGTGAATCATCGAATCTTTGAACGCACATTGCGCCCCCTGGCATTCCGGGGGGCATGCCTGTCCGAGCGTCATTTCTGCCCTCAAGCACGGCTTGTGTGTTGGGTGTGGTCCCCCCGGGGACCTGCCCGAAAGGCAGCG…
F8093	MK367556	Didymella pinodella T34 (MK089255)	99.21	516bp	GGGGAATTCTGAGTGTAGGCTTTGCCTGCTATCTCTTACCCATGTCTTTTGAGTACCTTCGTTTCCTCGGCGGGTTCGCCCGCCGATTGGACAATTTAAACCATTTGCAGTTGCAATCAGCGTCTGAAAAAACATAATAGTTACAACTTTCAACAACGGATCTCTTGGTTCTGGCATCGATGAAGAACGCAGCGAAATGCGATAAGTAGTGTGAATTGCAGAATTCAGTGAATCATCGAATCTTTGAACGCACATTGCGCCCCTTGGTATTCCATGGGGCATGCCTGTTCGAGCGTCATTTGTACCTTCAAGCTCTGCTTGGTGTTGGGTGTTTGTCTCGCCTCTGCGCGTAGACTCGCCTCAAAACAATTGGCAGCCGGCGTATTGATTTCGGAGCGC…
F8094	MK367557	Cladosporium cladosporioides (MH341182)	100	525bp	GGGGACTCAGTGACCGGTCTACCACCGGGATGTTCATAACCCTTTGTTGTCCGACTCTGTTGCCTCCGGGGCGACCCTGCCTTCGGGCGGGGGCTCCGGGTGGACACTTCAAACTCTTGCGTAACTTTGCAGTCTGAGTAAACTTAATTAATAAATTAAAACTTTTAACAACGGATCTCTTGGTTCTGGCATCGATGAAGAACGCAGCGAAATGCGATAAGTAATGTGAATTGCAGAATTCAGTGAATCATCGAATCTTTGAACGCACATTGCGCCCCCTGGTATTCCGGGGGGCATGCCTGTTCGAGCGTCATTTCACCACTCAAGCCTCGCTTGGTATTGGGCATCGCGGTCCGCCGCGTGCCTCAAATCGACCGGCTGGGTCTTCTGTCCCCTAAG…
F8095	MK367558	Phoma bellidis 1-30 (JF502444)	99.22	515bp	AAATCTAGAAGTGCGGGCTTTGCCTGCCATCTCTTACCCATGTCTTTTGAGTACCTTACGTTTCCTCGGCGGGTCCGCCCGCCGACTGGACAATTTAAACCACTTGCAGTTGCAATCAGCGTCTGAAAAAACTTAATAGTTACAACTTTCAACAACGGATCTCTTGGTTCTGGCATCGATGAAGAACGCAGCGAAATGCGATAAGTAGTGTGAATTGCAGAATTCAGTGAATCATCGAATCTTTGAACGCACATTGCGCCCCTTGGTATTCCATGGGGCATGCCTGTTCGAGCGTCATTTGTACCTTCAAGCCTTGCTTGGTGTTGGGTGTTTGTCTCGCCTCTGCGCGTAGACTCGCCTCAAAACAATTGGCAGCCGGCGTATTGATTTCGGAGCGCA…
F8096	MK367559	Colletotrichum sp. Acf-5 (MK795218)	99.45	547bp	GGGGGCTACTGACTACGCTCTACACCCTTTGTGACATACCTAACCGTTGCTTCGGCGGGCAGGGGAAGCCTCTCGTGGGCGGACCCTCCCGGCGCCGGCCCCGTCACGGGGGCGGAGCGCCCGCCGGAGGAAACCAAACTCTATTTACACGACGTCTCTTCTGAGTGGCACAAGCAAATAATTAAAACTTTTAACAACGGATCTCTTGGTTCTGGCATCGATGAAGAACGCAGCGAAATGCGATAAGTAATGTGAATTGCAGAATTCAGTGAATCATCGAATCTTTGAACGCACATTGCGCTCGCCAGCATTCTGGCGAGCATGCCTGTTCGAGCGTCATTTCAACCCTCAAGCACCGCTTGGTTTTGGGGCCCCACGGCCGACGTGGGCCCTTAAAGG…
F8097	MK367560	Colletotrichum godetiae Acf-14 (MK880362)	99.45	546bp	GTGGAATCTGAGTTCCGCTCTACACCCTTTGTGACATACCTAACCGTTGCTTCGGCGGGCAGGGGAAGCCTCTCGTGGGCGGACCCTCCCGGCGCCGGCCCCGTCACGGGGGCGGAGCGCCCGCCGGAGGAAACCAAACTCTATTTACACGACGTCTCTTCTGAGTGGCACAAGCAAATAATTAAAACTTTTAACAACGGATCTCTTGGTTCTGGCATCGATGAAGAACGCAGCGAAATGCGATAAGTAATGTGAATTGCAGAATTCAGTGAATCATCGAATCTTTGAACGCACATTGCGCTCGCCAGCATTCTGGCGAGCATGCCTGTTCGAGCGTCATTTCAACCCTCAAGCACCGCTTGGTTTTGGGGCCCCACGGCCGACGTGGGCCCTTAAAGG…
F8098	MK367561	Penicillium oxalicum (MH367526)	99.64	563bp	GATTTCGAGTGAGGGCCTCTGGGTCAACCTCCCACCCGTGTTTATCGTACCTTGTTGCTTCGGCGGGCCCGCCTCACGGCCGCCGGGGGGCATCCGCCCCCGGGCCCGCGCCCGCCGAAGACACACAAACGAACTCTTGTCTGAAGATTGCAGTCTGAGTACTTGACTAAATCAGTTAAAACTTTCAACAACGGATCTCTTGGTTCCGGCATCGATGAAGAACGCAGCGAAATGCGATAAGTAATGTGAATTGCAGAATTCAGTGAATCATCGAGTCTTTGAACGCACATTGCGCCCCCTGGTATTCCGGGGGGCATGCCTGTCCGAGCGTCATTGCTGCCCTCAAGCACGGCTTGTGTGTTGGGCTCTCGCCCCCCGCTTCCGGGGGGCGGGCCCGAA…
F8099	MK367562	Phomopsis lactucae PH11-23 (KR870840)	97.78	546bp	GTGGGACTGCTGGAGCGCTTCGGCGCACCCAGAAACCCTTTGTGAACTTATACCCATACTGTTGCCTCGGCGCAGGCCGGCCCCTCCTGGCAGGGGCCCCCTGGAGACAGGGAGCAGCCCGCCGGCGGCCAACCAAACTCTGTTTCTATAGTGAATCTCTGAGTACAAAACATAAATGAATCAAAACTTTCAACAACGGATCTCTTGGTTCTGGCATCGATGAAGAACGCAGCGAAATGCGATAAGTAATGTGAATTGCAGAATTCAGTGAATCATCGAATCTTTGAACGCACATTGCGCCCTCTGGTATTCCGGAGGGCATGCCTGTTCGAGCGTCATTTCAACCCTCAAGCCTGGCTTGGTGATGGGGCACTGCCTGTGAAAGGGCAGGCCCTGAAA…
F8100	MK367563	Dactylonectria macrodidyma HUGI11 (MK183814)	99.41	518bp	GAGGGAACGAGTTAACTCCCAACCCCTGTGACATACCTATTTGTTGCCTCGGCGGTGCCTGTTCCGACAGCCCGCCAGAGGACCCCAAACCCTGATTACATTTAAGAAGTCTTCTGAGTAAACCGATTAAATAAATCAAAACTTTCAACAACGGATCTCTTGGTTCTGGCATCGATGAAGAACGCAGCGAAATGCGATAAGTAATGTGAATTGCAGAATTCAGTGAATCATCGAATCTTTGAACGCACATTGCGCCCGCTAGTATTCTGGCGGGCATGCCTGTCCGAGCGTCATTTCAACCCTCAAGCCCCCGGGCTTGGTGTTGGGGATCGGCGAGCCTCCGCGCCCGCCGTCCCCTAAATCTAGTGGCGGTCTCGCTGTAGCTTCCTCTGCGTAGTA…
F8101	MK367564	Colletotrichum liriopes LrRF3 (MG543776)	99.81	543bp	GGGGAATTCTGAGTACGCTCTATAACCCTTTGTGACATACCTAACTGTTGCTTCGGCGGGCAGGGGGTCCCCTCGGGGACGCCCTCCCGGCCACGCCCTTCGCGGGGCGAGGCGCCCGCCGGAGGATACCAAACTCTATTTTAACGACGTTTCTTCTGAGTGGCACAAGCAAATAATTAAAACTTTTAACAACGGATCTCTTGGTTCTGGCATCGATGAAGAACGCAGCGAAATGCGATAAGTAATGTGAATTGCAGAATTCAGTGAATCATCGAATCTTTGAACGCACATTGCGCCCGCCAGCATTCTGGCGGGCATGCCTGTTCGAGCGTCATTTCAACCCTCAAGCTCTGCTTGGTGTTGGGGCCCTACGGTTGACGTAGGCCCTTAAAGGTAGTG…
F8102	MK367565	Aspergillus flavipes AfH04Y01 (MK952204)	99.82	558bp	TTGCATCGAGTGTAGGGTCTAGCGAGCCCAACCTCCCACCCGTGTTTACTGTACCTTAGTTGCTTCGGCGGGCCCGCCATTCATGGCCGCCGGGGGCTCTCAGCCCCGGGCCCGCGCCCGCCGGAGACACCACGAACTCTGTCTGATCTAGTGAAGTCTGAGTTGATTGTATCGCAATCAGTTAAAACTTTCAACAATGGATCTCTTGGTTCCGGCATCGATGAAGAACGCAGCGAAATGCGATAACTAGTGTGAATTGCAGAATTCCGTGAATCATCGAGTCTTTGAACGCACATTGCGCCCCCTGGTATTCCGGGGGGCATGCCTGTCCGAGCGTCATTGCTGCCCATCAAGCACGGCTTGTGTGTTGGGTCGTCGTCCCCTCTCCGGGGGGGACGG…
F8103	MK367566	Penicillium chrysogenum QRF370 (KP278201)	98.77	588bp	ATCGACCTTATGTAACGCAGGGTAGGCTCTGGGTCACCTCCCACCCGTGTTTATTTTACCTTGTTGCTTCGGCGGGCCCGCCTTAACTGGCCGCCGGGGGGCTTACGCCCCCGGGCCCGCGCCCGCCGAAGACACCCTCGAACTCTGTCTGAAGATTGTAGTCTGAGTGAAAATATAAATTATTTAAAACTTTCAACAACGGATCTCTTGGTTCCGGCATCGATGAAGAACGCAGCGAAATGCGATACGTAATGTGAATTGCAAATTCAGTGAATCATCGAGTCTTTGAACGCACATTGCGCCCCCTGGTATTCCGGGGGGCATGCCTGTCCGAGCGTCATTGCTGCCCTCAAGCACGGCTTGTGTGTTGGGCCCCGTCCTCCGATCCCGGGGGACGGG…
F8104	MK367567	Aspergillus flavipes AfH14F02 (MK952227)	100	560bp	GTTATCAGCCGAGTGTAGGTTCTAGCGAGCCCAACCTCCCACCCGTGTTTACTGTACCTTAGTTGCTTCGGCGGGCCCGCCATTCATGGCCGCCGGGGGCTCTCAGCCCCGGGCCCGCGCCCGCCGGAGACACCACGAACTCTGTCTGATCTAGTGAAGTCTGAGTTGATTGTATCGCAATCAGTTAAAACTTTCAACAATGGATCTCTTGGTTCCGGCATCGATGAAGAACGCAGCGAAATGCGATAACTAGTGTGAATTGCAGAATTCCGTGAATCATCGAGTCTTTGAACGCACATTGCGCCCCCTGGTATTCCGGGGGGCATGCCTGTCCGAGCGTCATTGCTGCCCATCAAGCACGGCTTGTGTGTTGGGTCGTCGTCCCCTCTCCGGGGGGGA…
F8106	MK367568	Aspergillus sp. HF2 (KR081398)	99.61	514bp	GGAATTCGAGTGCGGGCTCTGGGTCACCTCCCATCCGTGTCTATCTGTACCCTGTTGCTTCGGCGTGGCCACGGCCCGCCGAAGACTAACATTTGAACACTGTCTGAAGTTTGCAGTCTGAGTTTTTAGTTAAACAATAATTAAAACTTTCAACAACGGATCTCTTGGTTCCGGCATCGATGAAGAACGCAGCGAAATGCGATAATTAATGTGAATTGCAGAATTCAGTGAATCATCGAGTCTTTGAACGCACATTGCGCCCCCTGGTATTCCGGGGGGCATGCCTGTCCGAGCGTCATTGCTGCCCTCAAGCACGGCTTGTGTGTTGGGCTTCCGTCCCTGGTAACGGGGACGGGCCCAAAAGGCAGTGGCGGCACCATGTCTGGTCCTCGAGCGTAT…
100
