# Supplementary material for: Isolation, diversity, and antimicrobial activity of fungal endophytes from Rohdea chinensis (Baker) N.Tanaka (synonym Tupistra chinensis Baker) of Qinling Mountains, China
Source: PeerJ. 2020 Jun 17;8:e9342. doi: 10.7717/peerj.9342 (PMC7305772; doi:10.7717/peerj.9342)
Supplement: File S3 [file peerj-08-9342-s003.xlsx]

## Sheet: Sheet1
The raw data for antimicrobial activity
Isolates No	Taxa (Accession number)	Inhibition zone in diameter on Petri plate (mm)
		B. cereus			E.coli				B. subtilis			S. aureus			P. aeruginosa			X. oryzae			C. albicans
F8001	Leptospora sp.(MK367469)	19.5	19.1	18.9	-	-	-	-	-	-	16.7	15.6	16.3	11.1	11.9	11.5	-	-	-	-	-	-
F8002	Chaetomium sp.(MK367470)	-	-	-	-	-	-	-	-	-	11.3	11.2	10.8	9.8	10.6	10.3	-	-	-	-	-	-
F8003	Leptostroma sp.(MK367471)	-	-	-	-	-	-	-	-	-	14.5	14.1	13.9	-	-	-	-	-	-	17.6	17.4	16.7
F8032	Annulohypoxylon sp.(MK367499)	-	-	-	-	-	-	15.1	15.9	15.3	-	-	-	-	-	-	-	-	-	-	-	-
F8036	Biscogniauxia sp.(MK367503)	12.6	12.3	12.1	-	-	-	14.8	14.5	13.7	-	-	-	-	-	-	-	-	-	-	-	-
F8038	Penicillium sp.(MK367505)	16.1	15.3	15.6	-	-	-	16.4	16.1	16.4	-	-	-	-	-	-				-	-	-
F8047	Nigrospora sp.(MK367514)	-	-	-	-	-	-	-	-	-	-	-	-	-	-	-	-	-	-	19.2	19.4	19.9
F8049	Nemania sp.(MK367516)	-	-	-	-	-	-	-	-	-	-	-	-	-	-	-	-	-	-	10.9	11.6	11.3
F8073	Cylindrocarpon sp.(MK367537)	11.9	12.6	12.3	-	-	-	12.5	12.1	12.9	12.5	12.2	13.1	-	-	-	14.8	15.2	15.9	-	-	-
F8075	Clitopilus sp.(MK367539)	14.6	14.2	15	-	-	-	16.7	17.5	18.1	42.8	43.1	44.8	-	-	-	25.7	25.2	26.3	-	-	-
F8076	Nectria sp.( MK367540)	-	-	-	-	-	-	12.2	12.6	11.9	9.1	9.8	9.7	-	-	-	-	-	-	-	-	-
F8080	Chaetomium sp.(MK367544)	-	-	-	-	-	-	-	-	-	-	-	-	-	-	-	12.8	11.8	12.5	-	-	-
F8081	Fusarium sp.(MK367545)	17.4	18.2	16.8	-	-	-	-	-	-	-	-	-	-	-	-	-	-	-	-	-	-
F8086	Trichoderma sp.(MK367549)	-	-	-	-	-	-	-	-	-	-	-	-	-	-	-	-	-	-	19.4	21.4	21.1
F8106	Aspergillus sp.(MK367568)	16.1	16.5	16.9	16.6	17.5	16.2	-	-	-	-	-	-	-	-	-	-	-	-	-	-	-
Note: Bacillus cereus (B. cereus); Escherichia coli (E.coli ); Bacillus subtilis (B. subtilis); Staphylococcus aureus (S. aureus); Pseudomonas aeruginosa (P. aeruginosa); Xanthomonas oryzae (X. oryzae); Candida albicans (C. albicans)
Representative experimental photographs of antimicrobial activity
					20.6
